# Supplementary material
Source: publisher figshare collection journal article supplement (https://acs.figshare.com/ndownloader/files/3949129)
Supplement: Supplementary file 1 [file 3949129]

Understanding the thermal and mechanical stabilities of olivine-type  
LiMPO<sub>4</sub> (M=Fe, Mn) as cathode materials for rechargeable lithium  
batteries from first-principles

Ying Xie <sup>a\*</sup>, Hai-Tao Yu <sup>a</sup>, Ting-Feng Yi <sup>a,b\*</sup>, Yan-Rong Zhu <sup>b</sup>

<sup>a</sup> *Key Laboratory of Functional Inorganic Material Chemistry (Heilongjiang University) , Ministry  
of Education, School of Chemistry and Materials Science, Heilongjiang University, Harbin  
150080, PR China*

<sup>b</sup> *School of Chemistry and Chemical Engineering, Anhui University of Technology, Maanshan,  
Anhui 243002, PR China*

Corresponding Author

\*E-mail: xieying@hlju.edu.cn (Dr. Ying Xie); tfyihit@163.com (Dr. Ting-Feng Yi).

Tel.: +86 -555 2311807. Fax: +86 555 2311552

## Supporting informations

### Theoretical details for calculating the Gibbs formation energies from elements ( $\Delta_f G_{m, \text{el.}}$ ) or from oxides ( $\Delta_r G_{m, \text{ox.}}$ ).

#### (1) Gibbs formation energies from elements ( $\Delta_f G_{m, \text{el.}}$ ).

To evaluate the Gibbs formation energies ( $\Delta_f G_{m, \text{el.}}$ ) of  $\text{LiMPO}_4$  ( $M=\text{Fe, Mn}$ ) cathode materials from element phases, the molar Gibbs free energies of reactions ( $\Delta_r G_m$ ) were calculated first. The molar Gibbs free energies of reactions ( $\Delta_r G_m$ ) are directly related to the chemical reactions and can be derived from the energies of reactants and products. The thermodynamic cycles are described below,

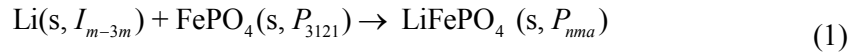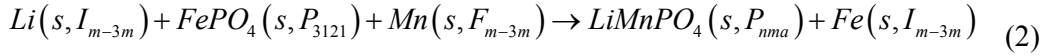

As the entropy change and volume effect of solid materials are usually small and can be neglected,  $\Delta_r G_m$  (Eq.(1)) and  $\Delta_r G_m$  (Eq.(2)) can be obtained approximately by,

$$\Delta_r G_m(\text{Eq.}(1)) = E(\text{LiFePO}_4) - E(\text{Li}) - E(\text{FePO}_4) \quad (3)$$

$$\Delta_r G_m(\text{Eq.}(2)) = E(\text{LiMnPO}_4) + E(\text{Fe}) - E(\text{Mn}) - E(\text{Li}) - E(\text{FePO}_4) \quad (4)$$

Furthermore, because the Gibbs free energy of reactions can be alternatively deduced from the Gibbs formation energies of substances, Eq. (3) and Eq. (4) can also be rewritten as,

$$\Delta_r G_m(\text{Eq.}(1)) = \Delta_f G_m(\text{LiFePO}_4) - \Delta_f G_m(\text{Li}) - \Delta_f G_m(\text{FePO}_4) \quad (5)$$

$$\Delta_r G_m(\text{Eq.}(2)) = \Delta_f G_m(\text{LiMnPO}_4) + \Delta_f G_m(\text{Fe}) - \Delta_f G_m(\text{Mn}) - \Delta_f G_m(\text{Li}) - \Delta_f G_m(\text{FePO}_4) \quad (6)$$

According to the available Gibbs formation energies of substances (See Table S1),  $\Delta_f G_{m, \text{el.}}(\text{LiFePO}_4)$  and  $\Delta_f G_{m, \text{el.}}(\text{LiMnPO}_4)$  can be determined. Furthermore, on the basis of similar algorithms, the Gibbs formation energies of  $\text{FePO}_4$  ( $P_{nma}$ ) and  $\text{MnPO}_4$  ( $P_{nma}$ ) from elements can also be derived, and the relevant reactions are

described as follows,

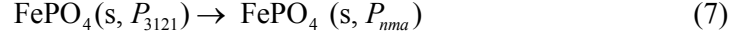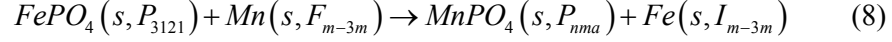

For  $\text{LiMO}_2$  ( $R_{\bar{3}m}$ ),  $\text{MO}_2$  ( $R_{\bar{3}m}$ ),  $\text{LiMn}_2\text{O}_4$  ( $F_{d\bar{3}m}$ ), and  $\text{Mn}_2\text{O}_4$  ( $F_{d\bar{3}m}$ ) electrode materials, the experimental reaction pathways were considered<sup>1-3</sup>,

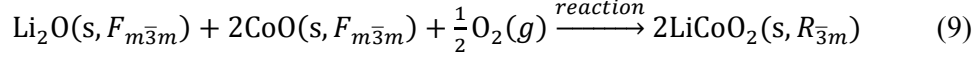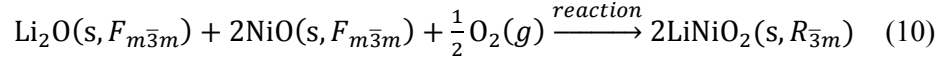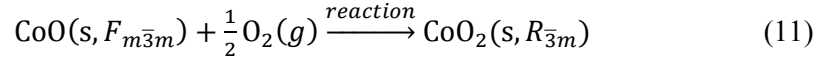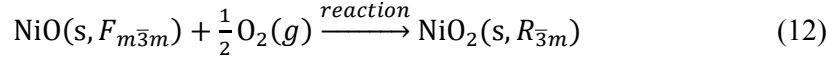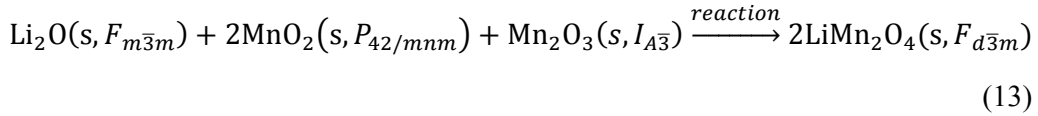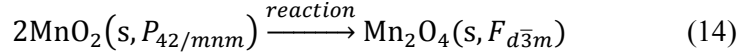

In a word, when the Gibbs free energies of a reaction ( $\Delta_r G_m$ ) was obtained, the molar Gibbs formation energies ( $\Delta_f G_{m,\text{el.}}$ ) of the cathode materials **from element phases** can be determined. The computational results were summarized in Table 2.

## (2) Gibbs free energy of relevant decomposition reactions ( $\Delta_r G_{m,\text{ox.}}$ ).

As a negative Gibbs formation energy relative to elemental phases is not sufficient to prove that a material is thermodynamically stable<sup>4,5</sup>, the Gibbs free energies of some relevant decomposition reactions were also introduced. Furthermore, to compare with the available experimental data<sup>1-3</sup>, **we have rewritten the decomposition reactions in a reverse manner**. For  $\text{LiMPO}_4$  and  $\text{MPO}_4$  compounds, the reactions were,

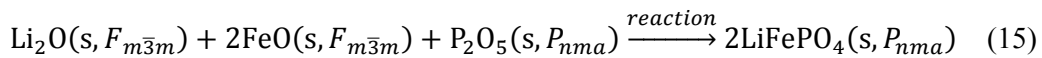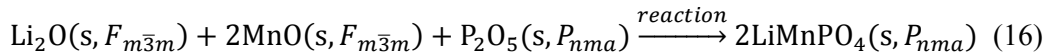

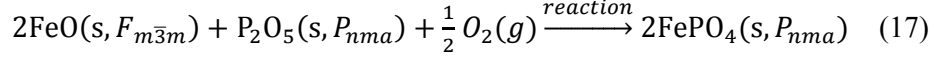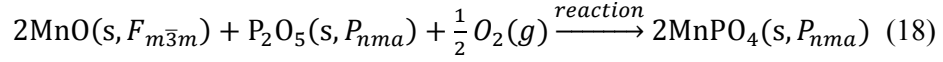

For  $\text{LiMO}_2$  ( $R_{\bar{3}m}$ ),  $\text{MO}_2$  ( $R_{\bar{3}m}$ ),  $\text{LiMn}_2\text{O}_4$  ( $F_{d\bar{3}m}$ ), and  $\text{Mn}_2\text{O}_4$  ( $F_{d\bar{3}m}$ ) electrode materials, the experimental reaction pathways (Eq.(9)~Eq.(14)) were also used.

It should be noted that the Gibbs free energies of relevant reactions ( $\Delta_r G_m$ , Eq. (9) to Eq. (18)) actually correspond to the Gibbs formation energies of cathode compounds *from relevant oxides* ( $\Delta_f G_{m,ox.}$ ). If one would like to analyze the thermodynamic stabilities of cathode materials, then the reaction free energies for relevant decomposition reactions obtained by replacing the values above with a negative sign (“-”) should be used. Table S1 listed the experimental formation enthalpies, Gibbs formation energies, and our calculated total energies of relevant compounds, from which the quantities listed in Table 2 can be derived.

### (3) Other possible decomposition products and reactions.

As suggested by the experimental data in Table S1,  $\text{M}_2\text{O}_3$  and  $\text{M}_3\text{O}_4$  are much more stable than MO. It seems that the calculated reaction free energies would change from positive to negative when the more stable decomposition products were chosen, and the decomposition reactions became spontaneous.

However, this assumption is not always correct due to the *stoichiometry restriction of a reaction*. By taking  $\text{M}_2\text{O}_3$  as an example, we can construct the following reaction,

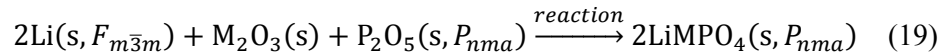

According to the data listed in Table S1, the reaction free energies are calculated to be -481.282 and -491.939  $\text{kJ}\cdot\text{mol}^{-1}$  for  $\text{LiFePO}_4$  and  $\text{LiMnPO}_4$  respectively. The results indicated that  $\text{LiMPO}_4$  is more difficult to decompose into  $\text{M}_2\text{O}_3$  when comparing with the MO case. Such a phenomenon is not difficult to understand, because Eq. (19) can be combined with Eq. (20) to form Eq. (21),

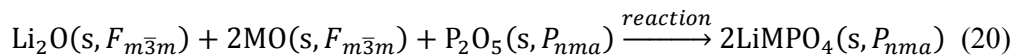

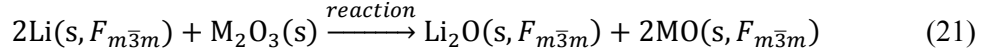

Although  $\text{M}_2\text{O}_3$  is much more stable than MO, the total free energy of the right-hand side of Eq. (21) is actually more negative than that of the left-hand side one. Therefore,  $\text{LMPO}_4$  trends to be decomposed into MO and  $\text{Li}_2\text{O}$  rather than lithium and  $\text{M}_2\text{O}_3$ . Similarly, when  $\text{M}_3\text{O}_4$  was considered, the reaction can be revised to,

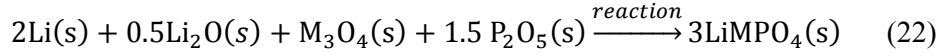

The calculated reaction free energies for the  $\text{LiFePO}_4$  and  $\text{LiMnPO}_4$  cases were about  $-459.714$  and  $-487.111 \text{ kJ}\cdot\text{mol}^{-1}$ , respectively. Therefore,  $\text{LiMPO}_4$  is still preferred to decompose into MO rather than  $\text{M}_3\text{O}_4$ . The combination of Eq. (21) and Eq. (22) produces Eq. (23), which makes the reason obvious.

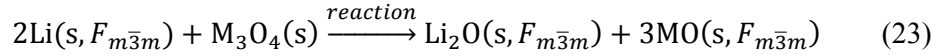

When the rodolicoite products were considered, the reaction can be revised to,

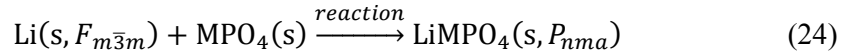

It should be pointed out that only one structure for  $\text{MnPO}_4$  can be found and its symmetry ( $P_{nma}$ ) is identical to that of  $\text{LiMnPO}_4$  compound. In this case, only  $\text{LiFePO}_4$  should be considered, and the reaction free energy is about  $-384.864 \text{ kJ}\cdot\text{mol}^{-1}$ . As the free energies of the decomposition reactions mentioned above are all higher (absolute value) than the values for the MO case, MO is thus chosen to be the decomposition product. Moreover, for the delithiated states, additional decomposition reactions were also considered,

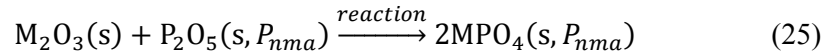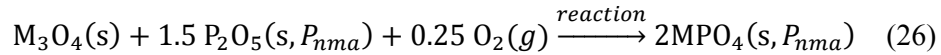

The calculated reaction free energies of Eq. (25) are about  $-142.052$  and  $-103.413 \text{ kJ}\cdot\text{mol}^{-1}$  for  $\text{FePO}_4$  and  $\text{MnPO}_4$  respectively, while the values of Eq. (26) are  $-218.609$  and  $-196.710 \text{ kJ}\cdot\text{mol}^{-1}$ . Therefore, delithiated state  $\text{MPO}_4$  trends to be decomposed into  $\text{M}_2\text{O}_3$  rather than MO or  $\text{M}_3\text{O}_4$ .

## References:

- (1) Wang, M.; Navrotsky, A., *J. Solid State Chem*, **2005**, 178, 1230-1240.

- (2) Wang, M.; Navrotsky, A., *Solid State Ionics* **2004**, *166*, 167-173.
- (3) Wang, M.; Navrotsky, A., *J. Solid State Chem.* **2005**, *178*, 1182-1189.
- (4) Ong, S. P.; Mo, Y. F.; Richards, W. D.; Lee, H. S.; Ceder, G., *Energy Environ. Sci.* **2013**, *6*, 148-156.
- (5) Ong, S. P.; Wang, L.; Kang, B.; Ceder, G., *Chem. Mater.* **2008**, *20*, 1798-1807.
- (6) Barin, I., *Thermochemical Data of Pure Substances* (3rd Edition), Wiley-VCH Verlag GmbH, Weinheim, Germany, 1995.

Table S1 Experimental formation enthalpies, Gibbs formation energies, and calculated total energies of relevant compounds.

| Compd.                           | Sym.            | $\Delta_f H_m$ (kJ·mol <sup>-1</sup> ) <sup>a</sup> | $\Delta_f G_m$ (kJ·mol <sup>-1</sup> ) <sup>a</sup> | Total Energies (eV) |
|----------------------------------|-----------------|-----------------------------------------------------|-----------------------------------------------------|---------------------|
| Li                               | $I_{m\bar{3}m}$ | 0.000                                               | 0.000                                               | -190.19897          |
| Mn                               | $F_{m\bar{3}m}$ | 0.000                                               | 0.000                                               | -655.20625          |
| Fe                               | $I_{m\bar{3}m}$ | 0.000                                               | 0.000                                               | -867.28118          |
| Li <sub>2</sub> O                | $F_{m\bar{3}m}$ | -598.730                                            | -562.104                                            | -821.04953          |
| FeO                              | $F_{m\bar{3}m}$ | -272.044                                            | -251.441                                            | -1302.64440         |
| Fe <sub>2</sub> O <sub>3</sub>   | $R_{\bar{3}c}$  | -824.248                                            | -742.294                                            | -3041.92398         |
| Fe <sub>3</sub> O <sub>4</sub>   | $F_{d\bar{3}m}$ | -1118.383                                           | -1015.227                                           | -4343.23076         |
| MnO                              | $F_{m\bar{3}m}$ | -385.221                                            | -362.898                                            | -1092.04591         |
| MnO <sub>2</sub>                 | $P_{42/mnm}$    | -520.029                                            | -465.138                                            | -1525.02246         |
| Mn <sub>2</sub> O <sub>3</sub>   | $I_{A\bar{3}}$  | -959.002                                            | -881.114                                            | -2620.71916         |
| Mn <sub>3</sub> O <sub>4</sub>   | $I_{41/AMD}$    | -1387.799                                           | -1283.232                                           | -3710.90307         |
| CoO                              | $F_{m\bar{3}m}$ | -237.944                                            | -214.198                                            | -1479.63688         |
| NiO                              | $F_{m\bar{3}m}$ | -239.701                                            | -211.539                                            | -1791.92028         |
| P <sub>2</sub> O <sub>5</sub>    | $P_{nma}$       | —                                                   | —                                                   | -2550.23523         |
| O <sub>2</sub>                   | —               | 0.000                                               | 0.000                                               | -869.09653          |
| FePO <sub>4</sub>                | $P_{3121}$      | -1297.500                                           | -1184.607                                           | -2797.07886         |
| LiFePO <sub>4</sub>              | $P_{nma}$       | —                                                   | —                                                   | -2991.26647         |
| FePO <sub>4</sub>                | $P_{nma}$       | —                                                   | —                                                   | -2797.55180         |
| LiMnPO <sub>4</sub>              | $P_{nma}$       | —                                                   | —                                                   | -2780.77451         |
| MnPO <sub>4</sub>                | $P_{nma}$       | —                                                   | —                                                   | -2586.54894         |
| LiCoO <sub>2</sub>               | $R_{\bar{3}m}$  | —                                                   | —                                                   | -2108.82026         |
| CoO <sub>2</sub>                 | $R_{\bar{3}m}$  | —                                                   | —                                                   | -1914.43739         |
| LiNiO <sub>2</sub>               | $R_{\bar{3}m}$  | —                                                   | —                                                   | -2420.22535         |
| NiO <sub>2</sub>                 | $R_{\bar{3}m}$  | —                                                   | —                                                   | -2225.91495         |
| LiMn <sub>2</sub> O <sub>4</sub> | $F_{d\bar{3}m}$ | —                                                   | —                                                   | -3248.26733         |

|                         |                 |   |   |             |
|-------------------------|-----------------|---|---|-------------|
| $\text{Mn}_2\text{O}_4$ | $F_{d\bar{3}m}$ | — | — | -3053.88401 |
|-------------------------|-----------------|---|---|-------------|

<sup>a</sup> Standard state experimental data are taken from Ref. <sup>6</sup>

#### (4) Reaction free energies for $2\text{MPO}_4 \rightarrow \text{M}_2\text{P}_2\text{O}_7 + 0.5\text{O}_2$ .

As the decomposition reaction,  $2\text{MnPO}_4 \rightarrow \text{Mn}_2\text{P}_2\text{O}_7 + 0.5\text{O}_2$ , was reported in literature, to provide some relevant information we also evaluated the corresponding reaction free energies. The values were listed in Table S2. The results indicated that the decomposition reaction from  $\text{MnPO}_4$  to  $\text{Mn}_2\text{P}_2\text{O}_7$  is endothermic, and the counterpart reaction for  $\text{FePO}_4$  compound is more difficult to occur, which is well consistent with experimental findings.

Table S2 Relevant quantities for reaction  $2\text{MPO}_4 \rightarrow \text{M}_2\text{P}_2\text{O}_7 + 0.5\text{O}_2$ .

|                           | $E(\text{MPO}_4)$<br>(eV) | $E(\text{M}_2\text{P}_2\text{O}_7)$<br>(eV) | $E(\text{O}_2)$<br>(eV) | $S^\circ(\text{O}_2)$<br>(J/mol) <sup>a</sup> | $\Delta_r G_m$<br>(kJ·mol <sup>-1</sup> ) |
|---------------------------|---------------------------|---------------------------------------------|-------------------------|-----------------------------------------------|-------------------------------------------|
| $\text{FePO}_4 (P_{nma})$ | -2797.5518                | -5156.2659                                  | -869.0965               | 205.15                                        | 206.89                                    |
| $\text{MnPO}_4 (P_{nma})$ | -2586.5489                | -4735.3909                                  | -869.0965               | 205.15                                        | 152.34                                    |

<sup>a</sup> standard entropy for gas phase  $\text{O}_2$  taken from NIST chemistry webbook (<http://webbook.nist.gov/>).

## Algorithms for calculating the mechanical properties

### (1) Stress-Strain relationship.

For each material, both stress and strain have three tensile and three shear components, giving six components in total. According to the theory of elasticity, a 6×6 symmetric matrix with 36 elements is thus needed to describe the relationship between stress and strain. Thanks to the symmetries, the independent elastic constants are reduced to 9 values for orthorhombic crystals. Therefore, the strain dependence of stress can be expressed as

$$\begin{pmatrix} \sigma_{xx} \\ \sigma_{yy} \\ \sigma_{zz} \\ \tau_{yz} \\ \tau_{zx} \\ \tau_{xy} \end{pmatrix} = \begin{pmatrix} C_{11} & C_{12} & C_{13} & 0 & 0 & 0 \\ C_{21} & C_{22} & C_{23} & 0 & 0 & 0 \\ C_{31} & C_{32} & C_{33} & 0 & 0 & 0 \\ 0 & 0 & 0 & C_{44} & 0 & 0 \\ 0 & 0 & 0 & 0 & C_{55} & 0 \\ 0 & 0 & 0 & 0 & 0 & C_{66} \end{pmatrix} \begin{pmatrix} \varepsilon_{xx} \\ \varepsilon_{yy} \\ \varepsilon_{zz} \\ \gamma_{yz} \\ \gamma_{zx} \\ \gamma_{xy} \end{pmatrix} \quad (27)$$

where  $\sigma$  is tensile stress,  $\tau$  the shear stress,  $\varepsilon$  the tensile strain, and  $\gamma$  the shear strain.

$C_{ij}$  ( $i = 1, 6; j = 1, 6$ ) are elastic constant matrix elements and they are related to the compliance ( $S_{ij}$ ) matrix elements by  $S = C^{-1}$ .

### (2) Mechanical stability criterion.

Born and Huang<sup>7</sup> have systematically investigated the lattice mechanical stability and formulated the stability criteria in terms of the elastic constants  $C_{ij}$ , and they pointed out that the criterion for a mechanically stable lattice requires that the elastic energy density be a positive definite quadratic function of strain. For orthorhombic crystals, the criteria are<sup>8,9</sup>



$$C_{11}+C_{22}+C_{33}+2C_{12}+2C_{13}+2C_{23}>0 \quad (28)$$

$$C_{11}+C_{33}-2C_{13}>0 \quad (29)$$

$$C_{11}+C_{22}-2C_{12}>0 \quad (30)$$

$$C_{22}+C_{33}-2C_{23}>0 \quad (31)$$

$$C_{ij}(i=j)>0 \quad (32)$$

### (3) Methods for evaluating the polycrystalline modulus.

To obtain a reasonable result, the moduli for polycrystalline materials should be used in the present case. There are two approximation methods to calculate the polycrystalline modulus, namely, the Voigt scheme and the Reuss one. For orthorhombic crystals, the shear modulus ( $G$ ) and the bulk modulus ( $B$ ) according to Reuss (subscripts  $R$ ) and Voigt (subscripts  $V$ ) approximations are given by,

$$\frac{1}{G_R} = \frac{4}{15}(S_{11} + S_{22} + S_{33}) - \frac{4}{15}(S_{12} + S_{13} + S_{23}) + \frac{3}{15}(S_{44} + S_{55} + S_{66}) \quad (33)$$

$$G_V = \frac{1}{15}(C_{11} + C_{22} + C_{33} - C_{12} - C_{13} - C_{23}) + \frac{1}{5}(C_{44} + C_{55} + C_{66}) \quad (34)$$

and

$$\frac{1}{B_R} = (S_{11} + S_{22} + S_{33}) + 2(S_{12} + S_{13} + S_{23}) \quad (35)$$

$$B_V = \frac{1}{9}(C_{11} + C_{22} + C_{33}) + \frac{2}{9}(C_{12} + C_{13} + C_{23}) \quad (36)$$

### References:

- (7) Born, M.; Huang, K., *Dynamical Theory of Crystal Lattices*, Oxford: Oxford University Press, 1998.
- (8) Jiang, C.; Srinivasan, S. G.; Caro, A.; Maloy, S. A., *J. Appl. Phys.* **2008**, *103*, 043502.
- (9) Koc, H.; Mamedov, Amirullah M.; Deligoz, E.; Ozisik, H., *Solid State Sci.* **2012**, *14*, 1211-1220.

## Correlation between shear deformation and chemical bonds

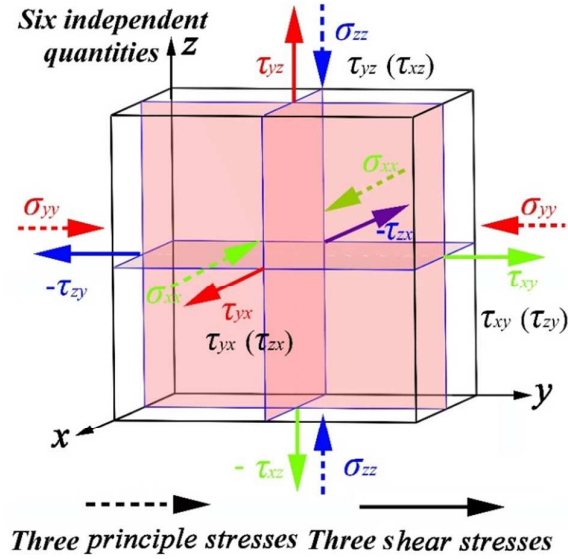

Figure S1 Materials under stresses.

Figure S1 showed the material under stresses. When the principle stress is applied, two shear stresses that are perpendicular to the normal stress appear. As a result, the material will suffer from strains and deformations. Principle strain and deformation will occur along the normal direction, while shear strain and deformation will happen along the shear direction.  $C_{11}$ ,  $C_{22}$ , and  $C_{33}$  are directly related to  $a$ ,  $b$ , and  $c$  directional resistance of materials against uniaxial tension, while  $C_{44}$ ,  $C_{55}$ , and  $C_{66}$  measure the shear resistance of materials regarding the  $\{100\}$ ,  $\{010\}$ , and  $\{001\}$  crystal planes against shear tensions.

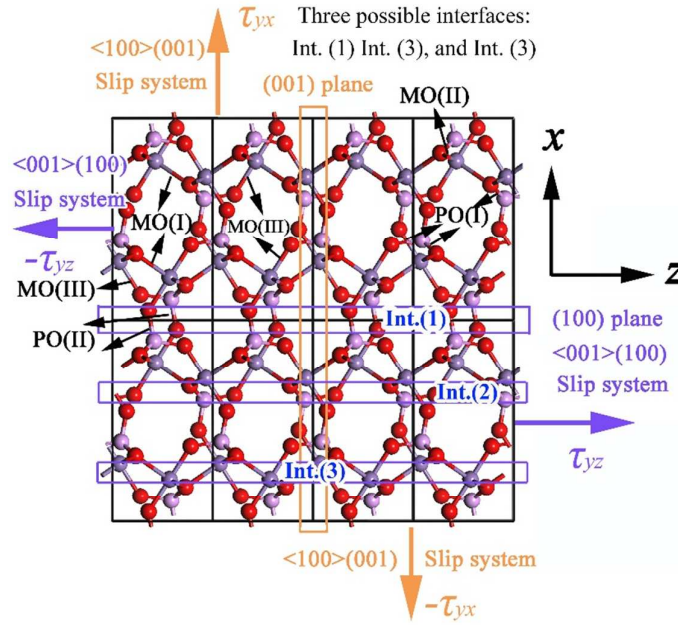

Figure S2 Scheme for the shear deformations within the xoz plane.

Figure S2 showed the projection of the  $\text{Li}_x\text{MPO}_4$  materials into the xoz plane. When the principle stress ( $\sigma_{yy}$ ) was applied along the y axis, principle deformation will occur along the [010] direction. At the same time,  $\tau_{yz}$  and  $\tau_{yx}$  will appear within the xoz plane, leading to the corresponding shear deformations. The shear deformation can be defined as the parallel movement of two parallel cross sections of the material. It is known that  $C_{44}$  is associated with  $\tau_{yz}$  and  $\gamma_{yz}$  ( $\tau_{yz}=C_{44}\cdot\gamma_{yz}$ ). When the shear stain occurs, the most active (100) interface is the one with the weakest bonding, and the shear deformation related to this (100) interface will be more energetically favorable. Figure S2 showed three possible (100) interfaces. To determine which one is the weakest, the total bond population per unit cell is calculated and the results were listed in Table S3.

It can be found that the third interface labeled as Int. (3) is the weakest. For a given plane the weakest chemical bond will play a dominant role. As a result, the shear deformation related to  $C_{44}$  and the (100) plane of  $\text{Li}_x\text{MPO}_4$  compounds will be determined by the weakest M-O(I) bond. This deduction can also be supported by the

following fact. After  $\text{Li}^+$  extraction, the total bond population of Int. (3) for  $\text{FePO}_4$  increases, while the value for  $\text{MnPO}_4$  is almost the same. However, the Mn-O(I) bond strength is weakened obviously (0.12 vs. 0.08), while the Fe-O(I) bond is nearly unchanged (0.12 vs. 0.13), which well explains why  $C_{44}$  of  $\text{MnPO}_4$  decreases significantly.

Table S3 Total bond populations for different interfaces of  $\text{Li}_x\text{MPO}_4$  compounds.

|                | no.      | Chemical bonds                                            | $\text{LiFePO}_4$ | $\text{FePO}_4$ | $\text{LiMnPO}_4$ | $\text{MnPO}_4$ |
|----------------|----------|-----------------------------------------------------------|-------------------|-----------------|-------------------|-----------------|
| $C_{44}$ (100) | Int. (1) | 2 P-O(II)                                                 | 1.32              | 1.32            | 1.30              | 1.30            |
|                | Int. (2) | 2 P-O(I), 2 M-O(III)                                      | 1.70              | 1.84            | 1.70              | 1.91            |
|                | Int. (3) | 4 M-O(I), 2 M-O(III)                                      | 0.98              | 1.18            | 0.98              | 1.02            |
| $C_{55}$ (010) | Int. (1) | 4 M-O(II)                                                 | 1.12              | 0.92            | 1.04              | 1.16            |
|                | Int. (2) | 2 PO(I), 2 M-O(I),<br>2 M-O(II)                           | 2.00              | 1.90            | 2.12              | 1.96            |
| $C_{66}$ (001) | Int. (1) | 2 P-O(II), 2 M-O(III)<br>4 M-O(I)                         | 2.30              | 2.50            | 2.28              | 2.32            |
|                | Int. (2) | 1 P-O(II), 2 P-O(II)<br>2 M-O(I), 2 M-O(II)<br>1 M-O(III) | 2.91              | 2.89            | 2.86              | 2.96            |
|                | Int. (3) | 4 M-O(I), 2 M-O(III)                                      | 0.98              | 1.18            | 0.98              | 1.02            |

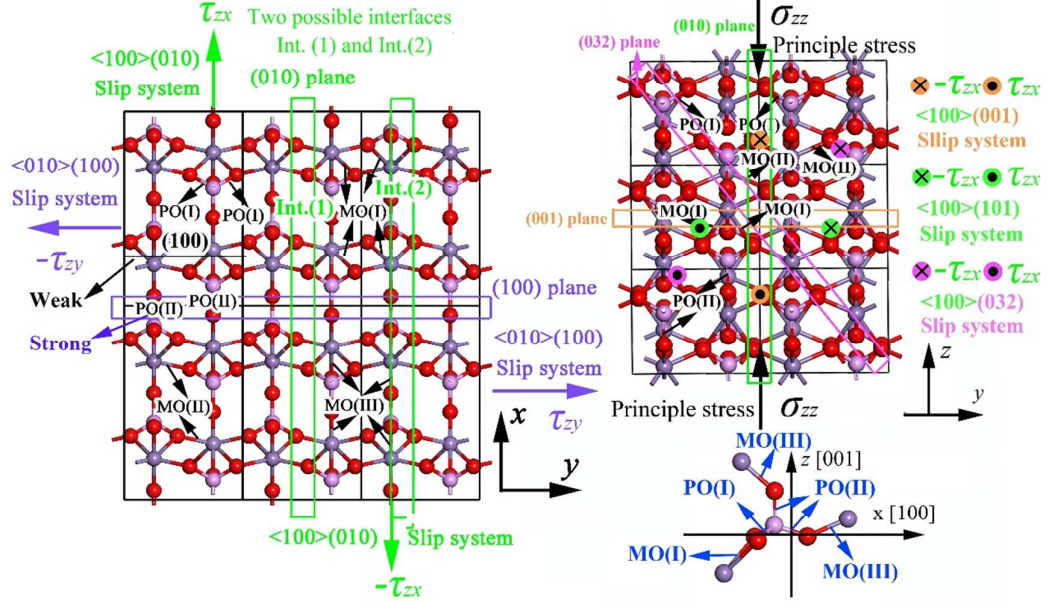

Figure S3 Scheme for the shear deformations related to  $\tau_{zx}$ .

$C_{55}$  is associated with  $\tau_{zx}$  and  $\gamma_{zx}$  ( $\tau_{zx} = C_{55} \gamma_{zx}$ ), and the corresponding shear deformation is related to the (010) plane. As showed in Figure S3, there are two possibilities, and the (010) plane is either across the M-O(II) bonds or across the M-O(I), M-O(II), and P-O(I) bonds. The total bond populations per unit cell for the former and the later cases are about 1.12 and 2.00 for  $\text{LiFePO}_4$ , respectively. Therefore, the shear deformation concerning the former (100) plane is preferable, and the M-O(II) bonds are thus responsible for the  $C_{55}$  values of  $\text{Li}_x\text{MPO}_4$  compounds. The right panel of Figure S3 also showed some slip systems relevant to  $\tau_{zx}$ . However, as there is no interface that is weaker than Int. (1), the shear deformation related to  $\tau_{zx}$  and  $\gamma_{zx}$  is thus restricted within the (010) plane.
